# Supplementary material
Source: PubMed Central journal article supplement (PMC7717582)

# Supplemental figure 1. Gating strategy for hPGCLC sorting.

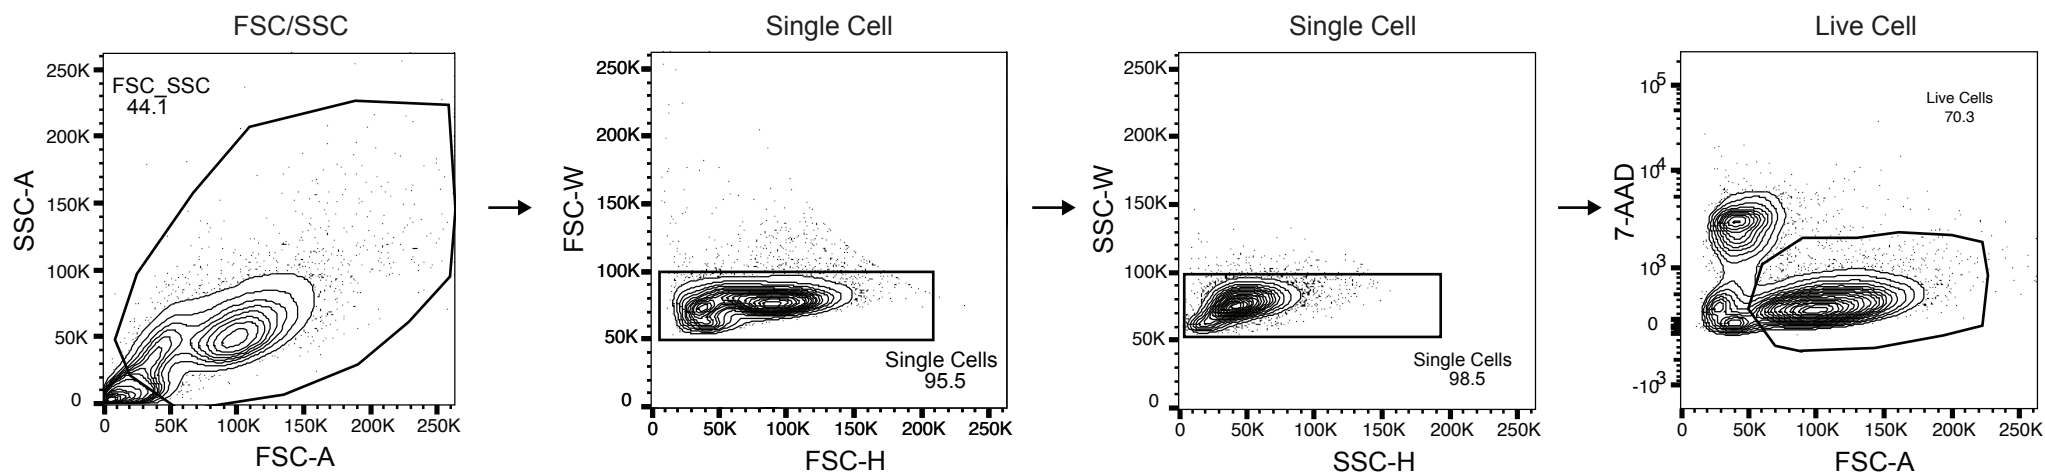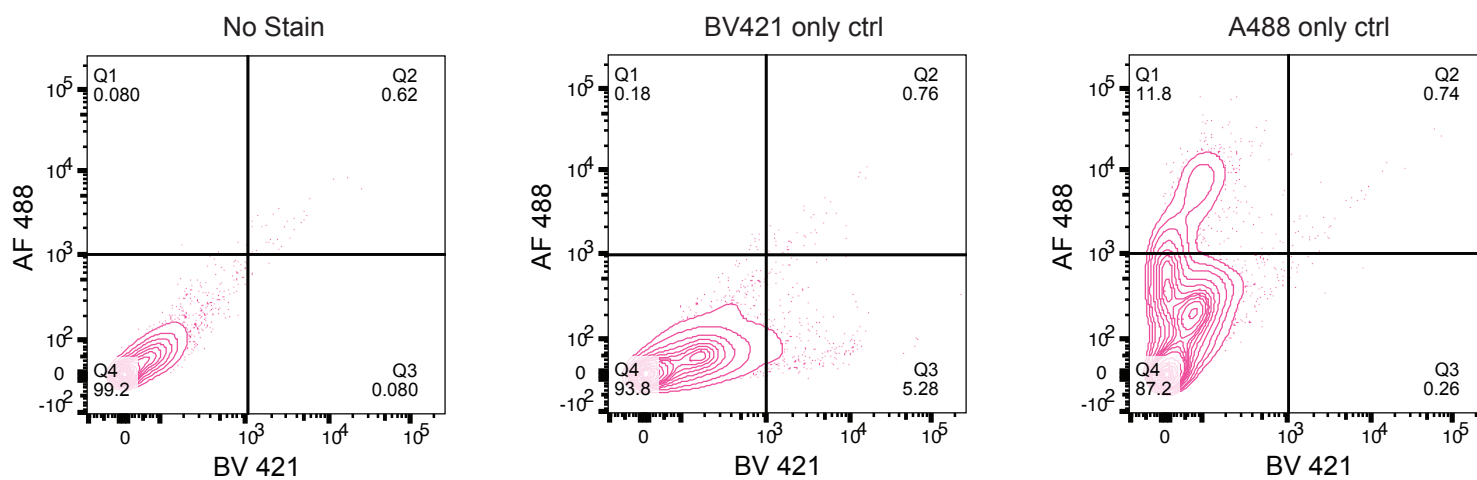

Supplement: NIHMS1641859-supplement-1.pdf [file NIHMS1641859-supplement-1.pdf]
